# Supplementary material for: Temperature- and solvent-induced reversible single-crystal-to-single-crystal transformations of TbIII-based MOFs with excellent stabilities and fluorescence sensing properties toward drug molecules
Source: Royal Society of Chemistry journal article supplement (doi:10.1039/d2qi00023g), 2022-01-01
Supplement: d2qi00023g1.pdf [file d2qi00023g1.pdf]

## ***Electronic Supplementary Information (ESI)***

### **Temperature- and solvent-induced reversible single-crystal-to-single-crystal transformations of Tb<sup>III</sup>-based MOFs with excellent stability and fluorescence sensing properties toward drug molecules**

Yu Li,<sup>‡</sup> Bi-Lian Chai,<sup>‡</sup> Hui Xu, Teng-Fei Zheng, Jing-Lin Chen, Sui-Jun Liu\* and He-Rui Wen

School of Chemistry and Chemical Engineering, Jiangxi Provincial Key Laboratory of Functional Molecular Materials Chemistry, Jiangxi University of Science and Technology, Ganzhou 341000, Jiangxi Province, P.R. China

---

\*Corresponding author. E-mail: sjliu@jxust.edu.cn (S.-J. Liu). Tel: +86-797-8312204.

<sup>‡</sup>These authors contributed equally to this work and should be considered co-first authors.

## **CONTENTS**

**Section 1. Experimental Section (page S3)**

**Section 2. Supplementary Tables, Scheme and Structural Figures  
(page S4-page S11)**

**Section 3. Supplementary Characterizations (page S12-page S27)**

## Section 1. Experimental Section

### 1. Materials and Instrumentations.

All starting materials including 5,5'-(benzo[c][1,2,5]thiadiazole-4,7-diyl) diisophthalic acid (H<sub>4</sub>BTDI) (Scheme S1) were reagent grade and used by the purchase without further purification. The powder X-ray diffraction (PXRD) patterns were recorded on a Rigaku Miniflex 600 instrument. The IR spectra were measured in the range of 4000–400 cm<sup>-1</sup> with KBr pellets on a Bruker Alpha FT-IR spectrometer. Thermogravimetric analysis (TGA) was carried out on a NETZSCH STA2500 (TG/DTA) thermal analyzer under a N<sub>2</sub> flow at a heating rate of 10 °C min<sup>-1</sup>. Fluorescence spectra were obtained using a F4600 (Hitachi) FL spectrophotometer. The ultraviolet visible (UV-vis) absorption spectra were collected on a UV-vis 2550 spectrophotometer. The calculation of H<sub>4</sub>BTDI and fleroxacin (FO) based on density functional theory was implemented by using GaussView 6.0. Elemental analysis (C, H, N and S) was performed on a vario EL cube elemental analyzer.

### 2. Crystallographic studies for JXUST-12, JXUST-12a and JXUST-12'.

Single-crystal X-ray diffraction data were obtained on a Bruker D8 QUEST diffractometer with Mo-K $\alpha$  radiation ( $\lambda = 0.71073 \text{ \AA}$ ) using  $\omega$  scan mode. The SAINT program was used for integration of the diffraction profiles.<sup>S1</sup> The structures were solved with direct methods and refined by using full-matrix least squares on F<sup>2</sup> with SHELXL-2017/1.<sup>S2</sup> All non-H atoms were confirmed by successive difference Fourier syntheses and treated isotropically. Moreover, all hydrogen atoms were calculated in idealized positions on a geometric basis and refined with restrictions. Because of the limited crystal quality, the hydrogen atoms of O3W and O4W (JXUST-12a) were not assigned and the positions of the corresponding hydrogen atoms of O2W could not be clearly localized. In addition, the solvent molecules in JXUST-12a could not be determined reasonably, which were squeezed *via* SQUEEZE program of PLATON<sup>S3</sup> software owing to the high disordering. The summary of the crystal data and structural refinements of JXUST-12, JXUST-12a and JXUST-12' is provided in Table S1 (ESI). Selected bond lengths and bond angles of JXUST-12, JXUST-12a and JXUST-12' are listed in Table S2-S4 (ESI).

#### Ref.

S1 *SAINT, Version 6.02a*, Bruker AXS Inc, Madison, WI, 2002.

S2 G. M. Sheldrick, *Acta Crystallogr. Sect. A: Found. Adv.*, 2015, **A71**, 3–8.

S3 A. L. Spek, *Acta Crystallogr. Sect. C: Struct. Chem.*, 2015, **C71**, 9–18.

## Section 2. Supplementary Tables, Scheme and Structural Figures

**Table S1.** Crystal data and structure refinements for **JXUST-12**, **JXUST-12a** and **JXUST-12'**.

| Compound                                                                                                       | <b>JXUST-12</b>                                                                                | <b>JXUST-12a</b>                                                                              | <b>JXUST-12'</b>                                                                               |
|----------------------------------------------------------------------------------------------------------------|------------------------------------------------------------------------------------------------|-----------------------------------------------------------------------------------------------|------------------------------------------------------------------------------------------------|
| formula                                                                                                        | C <sub>78</sub> H <sub>50</sub> N <sub>10</sub> O <sub>28</sub> S <sub>3</sub> Tb <sub>4</sub> | C <sub>66</sub> H <sub>30</sub> N <sub>6</sub> O <sub>32</sub> S <sub>3</sub> Tb <sub>4</sub> | C <sub>78</sub> H <sub>50</sub> N <sub>10</sub> O <sub>28</sub> S <sub>3</sub> Tb <sub>4</sub> |
| <i>Mr</i>                                                                                                      | 2307.14                                                                                        | 2150.82                                                                                       | 2307.14                                                                                        |
| <i>T</i> (K)                                                                                                   | 296(2)                                                                                         | 296(2)                                                                                        | 295(2)                                                                                         |
| crystal system                                                                                                 | triclinic                                                                                      | triclinic                                                                                     | triclinic                                                                                      |
| space group                                                                                                    | <i>P</i> $\bar{1}$                                                                             | <i>P</i> $\bar{1}$                                                                            | <i>P</i> $\bar{1}$                                                                             |
| <i>a</i> (Å)                                                                                                   | 10.9195(4)                                                                                     | 10.9806(9)                                                                                    | 10.9612(11)                                                                                    |
| <i>b</i> (Å)                                                                                                   | 12.0091(4)                                                                                     | 11.2912(11)                                                                                   | 11.9435(12)                                                                                    |
| <i>c</i> (Å)                                                                                                   | 15.8371(5)                                                                                     | 15.8685(13)                                                                                   | 15.8769(16)                                                                                    |
| $\alpha$ (°)                                                                                                   | 73.442(1)                                                                                      | 104.446(3)                                                                                    | 73.728(3)                                                                                      |
| $\beta$ (°)                                                                                                    | 70.805(1)                                                                                      | 109.909(2)                                                                                    | 70.543(2)                                                                                      |
| $\gamma$ (°)                                                                                                   | 86.913(1)                                                                                      | 90.567(3)                                                                                     | 87.158(3)                                                                                      |
| <i>V</i> (Å <sup>3</sup> )                                                                                     | 1878.16(11)                                                                                    | 1781.6(3)                                                                                     | 1879.1(3)                                                                                      |
| <i>Z</i>                                                                                                       | 1                                                                                              | 1                                                                                             | 1                                                                                              |
| <i>F</i> (000)                                                                                                 | 1120                                                                                           | 1032                                                                                          | 1120                                                                                           |
| <i>D</i> <sub>calc</sub> (g cm <sup>-3</sup> )                                                                 | 2.040                                                                                          | 2.005                                                                                         | 2.039                                                                                          |
| $\mu$ (mm <sup>-1</sup> )                                                                                      | 3.899                                                                                          | 4.105                                                                                         | 3.897                                                                                          |
| Collected reflections                                                                                          | 28294                                                                                          | 20932                                                                                         | 19152                                                                                          |
| Unique reflections                                                                                             | 8529                                                                                           | 6224                                                                                          | 6531                                                                                           |
| <i>R</i> <sub>int</sub>                                                                                        | 0.0336                                                                                         | 0.0371                                                                                        | 0.0305                                                                                         |
| <i>R</i> <sub>1</sub> <sup>a</sup> / <i>wR</i> <sub>2</sub> <sup>b</sup> [ <i>I</i> > 2 $\sigma$ ( <i>I</i> )] | 0.0457/0.1004                                                                                  | 0.0612/0.1426                                                                                 | 0.0690/0.1591                                                                                  |
| <i>R</i> <sub>1</sub> <sup>a</sup> / <i>wR</i> <sub>2</sub> <sup>b</sup> (all data)                            | 0.0604/0.1078                                                                                  | 0.0717/0.1510                                                                                 | 0.0805/0.1693                                                                                  |
| GOF on <i>F</i> <sup>2</sup>                                                                                   | 1.041                                                                                          | 1.175                                                                                         | 1.019                                                                                          |

$$^aR_1 = \Sigma(|F_0| - |F_C|)/\Sigma|F_0|. \quad ^b wR_2 = [\Sigma w(|F_0|^2 - |F_C|^2)^2 / (\Sigma w|F_0|^2)^2]^{1/2}.$$

**Table S2.** Selected bond lengths (Å) and angles (°) for **JXUST-12<sup>a</sup>**.

|                                          |            |                                         |            |
|------------------------------------------|------------|-----------------------------------------|------------|
| Tb1—O13                                  | 2.247(5)   | Tb2—O3                                  | 2.243(5)   |
| Tb1—O10 <sup>ii</sup>                    | 2.255(5)   | Tb2—O5                                  | 2.271(5)   |
| Tb1—O1                                   | 2.256(6)   | Tb2—O11 <sup>ii</sup>                   | 2.275(5)   |
| Tb1—O17                                  | 2.369(7)   | Tb2—O18                                 | 2.323(6)   |
| Tb1—O7 <sup>iii</sup>                    | 2.376(5)   | Tb2—O4 <sup>iv</sup>                    | 2.332(4)   |
| Tb1—O6 <sup>iii</sup>                    | 2.434(5)   | Tb2—O8 <sup>v</sup>                     | 2.344(5)   |
| Tb1 <sup>i</sup> —O2                     | 2.336(5)   | Tb2—O9 <sup>v</sup>                     | 2.428(5)   |
| O13—Tb1—O10 <sup>ii</sup>                | 85.98(18)  | O3—Tb2—O5                               | 87.65(19)  |
| O13—Tb1—O1                               | 78.6(2)    | O3—Tb2—O11 <sup>ii</sup>                | 83.3(2)    |
| O10 <sup>ii</sup> —Tb1—O1                | 97.2(2)    | O5—Tb2—O11 <sup>ii</sup>                | 84.65(17)  |
| O13—Tb1—O2 <sup>i</sup>                  | 86.10(18)  | O3—Tb2—O18                              | 156.6(2)   |
| O10 <sup>ii</sup> —Tb1—O2 <sup>i</sup>   | 161.4(2)   | O5—Tb2—O18                              | 100.9(2)   |
| O1—Tb1—O2 <sup>i</sup>                   | 97.7(2)    | O11 <sup>ii</sup> —Tb2—O18              | 76.0(2)    |
| O13—Tb1—O17                              | 80.0(2)    | O3—Tb2—O4 <sup>iv</sup>                 | 89.07(18)  |
| O10 <sup>ii</sup> —Tb1—O17               | 85.9(2)    | O5—Tb2—O4 <sup>iv</sup>                 | 169.88(16) |
| O1—Tb1—O17                               | 158.1(2)   | O11 <sup>ii</sup> —Tb2—O4 <sup>iv</sup> | 85.46(17)  |
| O2 <sup>i</sup> —Tb1—O17                 | 76.2(2)    | O18—Tb2—O4 <sup>iv</sup>                | 78.75(19)  |
| O13—Tb1—O7 <sup>iii</sup>                | 156.40(19) | O3—Tb2—O8 <sup>v</sup>                  | 89.31(19)  |
| O10 <sup>ii</sup> —Tb1—O7 <sup>iii</sup> | 104.45(19) | O5—Tb2—O8 <sup>v</sup>                  | 114.57(18) |
| O1—Tb1—O7 <sup>iii</sup>                 | 120.0(2)   | O11 <sup>ii</sup> —Tb2—O8 <sup>v</sup>  | 159.17(18) |
| O2 <sup>i</sup> —Tb1—O7 <sup>iii</sup>   | 77.45(19)  | O18—Tb2—O8 <sup>v</sup>                 | 106.4(2)   |
| O17—Tb1—O7 <sup>iii</sup>                | 79.8(2)    | O4 <sup>iv</sup> —Tb2—O8 <sup>v</sup>   | 74.94(18)  |
| O13—Tb1—O6 <sup>iii</sup>                | 149.28(19) | O3—Tb2—O9 <sup>v</sup>                  | 123.5(2)   |
| O10 <sup>ii</sup> —Tb1—O6 <sup>iii</sup> | 77.0(2)    | O5—Tb2—O9 <sup>v</sup>                  | 74.73(18)  |
| O1—Tb1—O6 <sup>iii</sup>                 | 78.4(2)    | O11 <sup>ii</sup> —Tb2—O9 <sup>v</sup>  | 144.45(19) |
| O2 <sup>i</sup> —Tb1—O6 <sup>iii</sup>   | 116.96(18) | O18—Tb2—O9 <sup>v</sup>                 | 79.8(2)    |
| O17—Tb1—O6 <sup>iii</sup>                | 123.3(2)   | O4 <sup>iv</sup> —Tb2—O9 <sup>v</sup>   | 114.93(18) |
| O7 <sup>iii</sup> —Tb1—O6 <sup>iii</sup> | 54.24(17)  | O8 <sup>v</sup> —Tb2—O9 <sup>v</sup>    | 54.14(17)  |

<sup>a</sup>Symmetry codes: (i)  $-x, -y+1, -z+1$ ; (ii)  $x, y, z-1$ ; (iii)  $x-1, y, z$ ; (iv)  $-x+1, -y+1, -z$ ; (v)  $x+1, y, z-1$ .

**Table S3.** Selected bond lengths (Å) and angles (°) for **JXUST-12a<sup>b</sup>**.

|                                          |           |                                         |           |
|------------------------------------------|-----------|-----------------------------------------|-----------|
| Tb1—O1                                   | 2.231(9)  | Tb2—O9                                  | 2.237(10) |
| Tb1—O8 <sup>ii</sup>                     | 2.244(7)  | Tb2—O7 <sup>ii</sup>                    | 2.263(7)  |
| Tb1—O11                                  | 2.320(11) | Tb2—O2                                  | 2.270(9)  |
| Tb1—O1W                                  | 2.339(11) | Tb2—O2W                                 | 2.317(11) |
| Tb1—O5 <sup>iii</sup>                    | 2.407(9)  | Tb2—O10 <sup>iv</sup>                   | 2.327(8)  |
| Tb1—O6 <sup>iii</sup>                    | 2.441(8)  | Tb2—O4 <sup>v</sup>                     | 2.364(7)  |
| Tb1—O11 <sup>i</sup>                     | 2.692(9)  | Tb2—O3 <sup>v</sup>                     | 2.470(7)  |
| Tb1 <sup>i</sup> —O12                    | 2.385(9)  | O1W—Tb1—O11 <sup>i</sup>                | 124.6(3)  |
| O1—Tb1—O8 <sup>ii</sup>                  | 89.0(3)   | O12 <sup>i</sup> —Tb1—O11 <sup>i</sup>  | 50.3(3)   |
| O1—Tb1—O11                               | 92.9(4)   | O5 <sup>iii</sup> —Tb1—O11 <sup>i</sup> | 72.3(3)   |
| O8 <sup>ii</sup> —Tb1—O11                | 79.3(4)   | O6 <sup>iii</sup> —Tb1—O11 <sup>i</sup> | 77.8(3)   |
| O1—Tb1—O1W                               | 77.4(4)   | O9—Tb2—O7 <sup>ii</sup>                 | 89.2(3)   |
| O8 <sup>ii</sup> —Tb1—O1W                | 81.6(4)   | O9—Tb2—O2                               | 82.5(4)   |
| O11—Tb1—O1W                              | 158.7(3)  | O7 <sup>ii</sup> —Tb2—O2                | 86.1(3)   |
| O1—Tb1—O12 <sup>i</sup>                  | 155.7(4)  | O9—Tb2—O2W                              | 159.0(3)  |
| O8 <sup>ii</sup> —Tb1—O12 <sup>i</sup>   | 84.5(3)   | O7 <sup>ii</sup> —Tb2—O2W               | 96.5(4)   |
| O11—Tb1—O12 <sup>i</sup>                 | 108.8(3)  | O2—Tb2—O2W                              | 77.7(4)   |
| O1W—Tb1—O12 <sup>i</sup>                 | 78.5(4)   | O9—Tb2—O10 <sup>iv</sup>                | 89.9(3)   |
| O1—Tb1—O5 <sup>iii</sup>                 | 100.4(4)  | O7 <sup>ii</sup> —Tb2—O10 <sup>iv</sup> | 170.7(3)  |
| O8 <sup>ii</sup> —Tb1—O5 <sup>iii</sup>  | 155.0(3)  | O2—Tb2—O10 <sup>iv</sup>                | 84.6(3)   |
| O11—Tb1—O5 <sup>iii</sup>                | 122.8(3)  | O2W—Tb2—O10 <sup>iv</sup>               | 81.2(3)   |
| O1W—Tb1—O5 <sup>iii</sup>                | 78.1(4)   | O9—Tb2—O4 <sup>v</sup>                  | 90.2(3)   |
| O12 <sup>i</sup> —Tb1—O5 <sup>iii</sup>  | 77.4(3)   | O7 <sup>ii</sup> —Tb2—O4 <sup>v</sup>   | 115.5(3)  |
| O1—Tb1—O6 <sup>iii</sup>                 | 76.9(3)   | O2—Tb2—O4 <sup>v</sup>                  | 157.2(3)  |
| O8 <sup>ii</sup> —Tb1—O6 <sup>iii</sup>  | 151.3(3)  | O2W—Tb2—O4 <sup>v</sup>                 | 105.3(3)  |
| O11—Tb1—O6 <sup>iii</sup>                | 76.6(4)   | O10 <sup>iv</sup> —Tb2—O4 <sup>v</sup>  | 73.8(3)   |
| O1W—Tb1—O6 <sup>iii</sup>                | 118.6(4)  | O9—Tb2—O3 <sup>v</sup>                  | 121.7(3)  |
| O12 <sup>i</sup> —Tb1—O6 <sup>iii</sup>  | 118.0(3)  | O7 <sup>ii</sup> —Tb2—O3 <sup>v</sup>   | 73.8(3)   |
| O5 <sup>iii</sup> —Tb1—O6 <sup>iii</sup> | 53.6(3)   | O2—Tb2—O3 <sup>v</sup>                  | 147.4(3)  |
| O1—Tb1—O11 <sup>i</sup>                  | 152.6(3)  | O2W—Tb2—O3 <sup>v</sup>                 | 79.3(3)   |
| O8 <sup>ii</sup> —Tb1—O11 <sup>i</sup>   | 108.8(3)  | O10 <sup>iv</sup> —Tb2—O3 <sup>v</sup>  | 114.3(3)  |
| O11—Tb1—O11 <sup>i</sup>                 | 71.1(4)   | O4 <sup>v</sup> —Tb2—O3 <sup>v</sup>    | 53.0(3)   |

<sup>b</sup>Symmetry codes: (i)  $-x, -y+1, -z-1$ ; (ii)  $x-1, y, z-1$ ; (iii)  $x, y, z-1$ ; (iv)  $-x, -y+1, -z$ ; (v)  $x-1, y, z$ .

**Table S4.** SHAPE analysis of Tb<sup>III</sup> ions in JXUST-12.

| <b>ions</b> | <b>label</b>  | <b>shape</b>                            | <b>symmetry</b>            | <b>distortion(<math>\tau</math>)</b> |
|-------------|---------------|-----------------------------------------|----------------------------|--------------------------------------|
| <b>Tb1</b>  | HP-7          | Heptagon                                | $D_{7h}$                   | 29.934                               |
|             | HPY-7         | Hexagonal pyramid                       | $C_{6v}$                   | 20.175                               |
|             | PBPY-7        | Pentagonal bipyramid                    | $D_{5h}$                   | 4.724                                |
|             | COC-7         | Capped octahedron                       | $C_{3v}$                   | 2.366                                |
|             | <b>CTPR-7</b> | <b>Capped trigonal prism</b>            | <b><math>C_{2v}</math></b> | <b>1.729</b>                         |
|             | JPBPY-7       | Johnson pentagonal bipyramid J13        | $D_{5h}$                   | 8.005                                |
|             | JETPY-7       | Johnson elongated triangular pyramid J7 | $C_{3v}$                   | 16.888                               |
| <b>Tb2</b>  | HP-7          | Heptagon                                | $D_{7h}$                   | 33.235                               |
|             | HPY-7         | Hexagonal pyramid                       | $C_{6v}$                   | 19.632                               |
|             | PBPY-7        | Pentagonal bipyramid                    | $D_{5h}$                   | 6.418                                |
|             | COC-7         | Capped octahedron                       | $C_{3v}$                   | 1.823                                |
|             | <b>CTPR-7</b> | <b>Capped trigonal prism</b>            | <b><math>C_{2v}</math></b> | <b>1.667</b>                         |
|             | JPBPY-7       | Johnson pentagonal bipyramid J13        | $D_{5h}$                   | 9.768                                |
|             | JETPY-7       | Johnson elongated triangular pyramid J7 | $C_{3v}$                   | 18.405                               |

**Table S5.** SHAPE analysis of Tb<sup>III</sup> ions in **JXUST-12a**.

| <b>ions</b>   | <b>label</b>  | <b>shape</b>                               | <b>symmetry</b>            | <b>distortion(<math>\tau</math>)</b> |        |
|---------------|---------------|--------------------------------------------|----------------------------|--------------------------------------|--------|
| <b>Tb1</b>    | OP-8          | Octagon                                    | $D_{8h}$                   | 33.372                               |        |
|               | HPY-8         | Heptagonal pyramid                         | $C_{7v}$                   | 21.390                               |        |
|               | HBPY-8        | Hexagonal bipyramid                        | $D_{6h}$                   | 14.986                               |        |
|               | CU-8          | Cube                                       | $O_h$                      | 9.743                                |        |
|               | <b>SAPR-8</b> | <b>Square antiprism</b>                    | <b><math>D_{4d}</math></b> | <b>2.301</b>                         |        |
|               | TDD-8         | Triangular dodecahedron                    | $D_{2d}$                   | 3.037                                |        |
|               | JGBF-8        | Johnson gyrobifastigium J26                | $D_{2d}$                   | 14.230                               |        |
|               | JETBPY-8      | Johnson elongated triangular bipyramid J14 | $D_{3h}$                   | 28.147                               |        |
|               | JBTPR-8       | Biaugmented trigonal prism J50             | $C_{2v}$                   | 3.467                                |        |
|               | BTPR-8        | Biaugmented trigonal prism                 | $C_{2v}$                   | 2.952                                |        |
|               | JSD-8         | Snub diphenooid J84                        | $D_{2d}$                   | 5.488                                |        |
|               | TT-8          | Triakis tetrahedron                        | $T_d$                      | 10.186                               |        |
|               | ETBPY-8       | Elongated trigonal bipyramid               | $D_{3h}$                   | 23.433                               |        |
|               | <b>Tb2</b>    | HP-7                                       | Heptagon                   | $D_{7h}$                             | 32.082 |
|               |               | HPY-7                                      | Hexagonal pyramid          | $C_{6v}$                             | 19.702 |
| PBPY-7        |               | Pentagonal bipyramid                       | $D_{5h}$                   | 5.840                                |        |
| COC-7         |               | Capped octahedron                          | $C_{3v}$                   | 2.343                                |        |
| <b>CTPR-7</b> |               | <b>Capped trigonal prism</b>               | <b><math>C_{2v}</math></b> | <b>1.563</b>                         |        |
| JPBPY-7       |               | Johnson pentagonal bipyramid J13           | $D_{5h}$                   | 9.115                                |        |
| JETPY-7       |               | Johnson elongated triangular pyramid J7    | $C_{3v}$                   | 17.919                               |        |



**Table S6.** The luminescence sensors with turn-on/turn-off effect based on some selected MOFs.

| Analyte | MOF                                                      | medium                          | luminescence effect    | $K_{sv} (M^{-1})/$<br>$K_{ec} (M^{-1})$ | LOD ( $\mu M$ ) | Ref.      |
|---------|----------------------------------------------------------|---------------------------------|------------------------|-----------------------------------------|-----------------|-----------|
| NFT     | $\{[Tb_4(BTDI)_3(H_2O)_4] \cdot 4H_2O\}_n$               | H <sub>2</sub> O                | Turn-off               | $1.74 \times 10^5$                      | 0.39            | This Work |
|         | $\{[Mg_2(APDA)_2(H_2O)_3] \cdot 5DMA \cdot 5H_2O\}_n$    | H <sub>2</sub> O                |                        | $8.82 \times 10^4$                      | 0.53            | [S4]      |
|         | $\{[Tb_4(BTDI)_3(H_2O)_4] \cdot 4H_2O\}_n$               | EtOH                            |                        | $1.34 \times 10^5$                      | 0.44            | This Work |
|         | $[Tb_4(BTDI)_3(DMF)_4]_n$                                | EtOH                            |                        | $4.36 \times 10^4$                      | 0.86            | This Work |
|         | $\{[NaCd_2(L)(BDC)_{2.5}] \cdot 9H_2O\}_n$               | DMF                             |                        | $3.57 \times 10^4$                      | 1.15            | [S5]      |
| NZF     | $\{[Tb_4(BTDI)_3(H_2O)_4] \cdot 4H_2O\}_n$               | H <sub>2</sub> O                | Turn-off               | $1.43 \times 10^5$                      | 0.43            | This Work |
|         | $\{[Mg_2(APDA)_2(H_2O)_3] \cdot 5DMA \cdot 5H_2O\}_n$    | H <sub>2</sub> O                |                        | $9.0 \times 10^4$                       | 0.55            | [S4]      |
|         | $\{[Tb_4(BTDI)_3(H_2O)_4] \cdot 4H_2O\}_n$               | EtOH                            |                        | $1.04 \times 10^5$                      | 0.40            | This Work |
|         | $[Tb_4(BTDI)_3(DMF)_4]_n$                                | EtOH                            |                        | $4.33 \times 10^4$                      | 0.82            | This Work |
|         | $\{[Cd_3(TDCPB) \cdot 2DMAc] \cdot DMAc \cdot 4H_2O\}_n$ | DMF                             |                        | $7.46 \times 10^4$                      | -----           | [S6]      |
| DCN     | $\{[Tb_4(BTDI)_3(H_2O)_4] \cdot 4H_2O\}_n$               | EtOH                            | Turn-off               | $1.23 \times 10^5$                      | 0.34            | This Work |
|         | $[Tb_4(BTDI)_3(DMF)_4]_n$                                | EtOH                            |                        | $4.75 \times 10^4$                      | 0.88            | This Work |
|         | $\{[Zn_2(bpdc)_2(BPyTPE)]\}_n$                           | CH <sub>2</sub> Cl <sub>2</sub> |                        | -----                                   | 0.63            | [S7]      |
|         | $\{[Zn_2(L)_2(TPA)] \cdot 2H_2O\}_n$                     | CH <sub>3</sub> OH              |                        | $2.36 \times 10^4$                      | 1.90            | [S8]      |
| OFX     | $\{[Tb_4(BTDI)_3(H_2O)_4] \cdot 4H_2O\}_n$               | H <sub>2</sub> O                | Turn-on and blue shift | $5.11 \times 10^3$                      | 7.34            | This Work |
|         | $\{[Zn(TIPA)pim_{0.5}]2H_2O \cdot NO_3\}_n$              | DMF                             | Turn-off               | $4.61 \times 10^4$                      | -----           | [S9]      |
| FO      | $\{[Tb_4(BTDI)_3(H_2O)_4] \cdot 4H_2O\}_n$               | H <sub>2</sub> O                | Turn-on and blue shift | $6.03 \times 10^3$                      | 2.28            | This Work |
|         | $Eu^{3+}@[(Me)_4N]_2[Pb_6K_6(m-BDC)_9(OH)_2] \cdot H_2O$ | H <sub>2</sub> O                | Turn-on                | -----                                   | 0.12            | [S10]     |

Ref.

S4 N. Xu, Q.-H. Zhang, B.-S. Hou, Q. Cheng and G.-A. Zhang, A novel magnesium metal-organic framework as a multiresponsive luminescent sensor for Fe(III) ions, pesticides, and antibiotics with high selectivity and sensitivity, *Inorg. Chem.*, 2018, **57**, 13330-13340.

S5 D. Zhao, X.-H. Liu, Y. Zhao, P. Wang, Y. Liu, M. Azam, S. I. Al-Resayes, Y. Lu and W.-Y. Sun, Luminescent Cd(II)-organic frameworks with chelating NH<sub>2</sub> sites for selective detection of Fe(III) and antibiotics, *J. Mater. Chem. A*, 2017, **5**, 15797-15807.

S6 Q.-Q. Zhu, Q.-S. Zhou, H.-W. Zhang, W.-W. Zhang, D.-Q. Lu, M.-T. Guo, Y. Yuan, F. Sun

- and H. He, Design and construction of a metal-organic framework as an efficient luminescent sensor for detecting antibiotics, *Inorg. Chem.*, 2020, **59**, 1323-1331.
- S7 C.-L. Tao, B. Chen, X.-G. Liu, L.-J. Zhou, X.-L. Zhu, J. Cao, Z.-G. Gu, Z.-J. Zhao, L. Shen and B.-Z. Tang, A highly luminescent entangled metal-organic framework based on pyridine-substituted tetraphenylethene for efficient pesticide detection, *Chem. Commun.*, 2017, **53**, 9975-9978.
- S8 X.-Y. Guo, Z.-P. Dong, F. Zhao, Z.-L. Liu and Y.-Q. Wang, Zinc(II)-organic framework as a multi-responsive photoluminescence sensor for efficient and recyclable detection of pesticide 2,6-dichloro4-nitroaniline, Fe(III) and Cr(VI), *New J. Chem.*, 2019, **43**, 2353-2361.
- S9 X.-Q. Yao, G.-B. Xiao, H. Xie, D.-D. Qin, H.-C. Ma, J.-C. Liu, and P.-J. Yan, Solvent-induced structural diversity of two luminescent metal-organic frameworks as dual-functional sensor for the detection of nitroaromatic compounds and highly selective detection of ofloxacin antibiotics, *CrystEngComm*, 2019, **21**, 2559-2570.
- S10 T.-Y. Liu, X.-L. Qua and B. Yan, A highly sensitive and selective “turn-on” fluorescent probe for detection of fleroxacin in human serum and urine based on a lanthanide functionalized metal-organic framework, *Dalton Trans.*, 2019, **48**, 17945-17952.

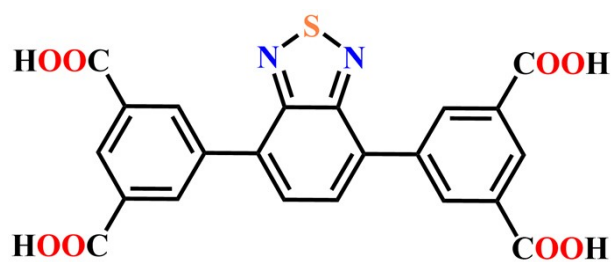

Scheme S1. The structure of  $\text{H}_4\text{BTDI}$  ligand.

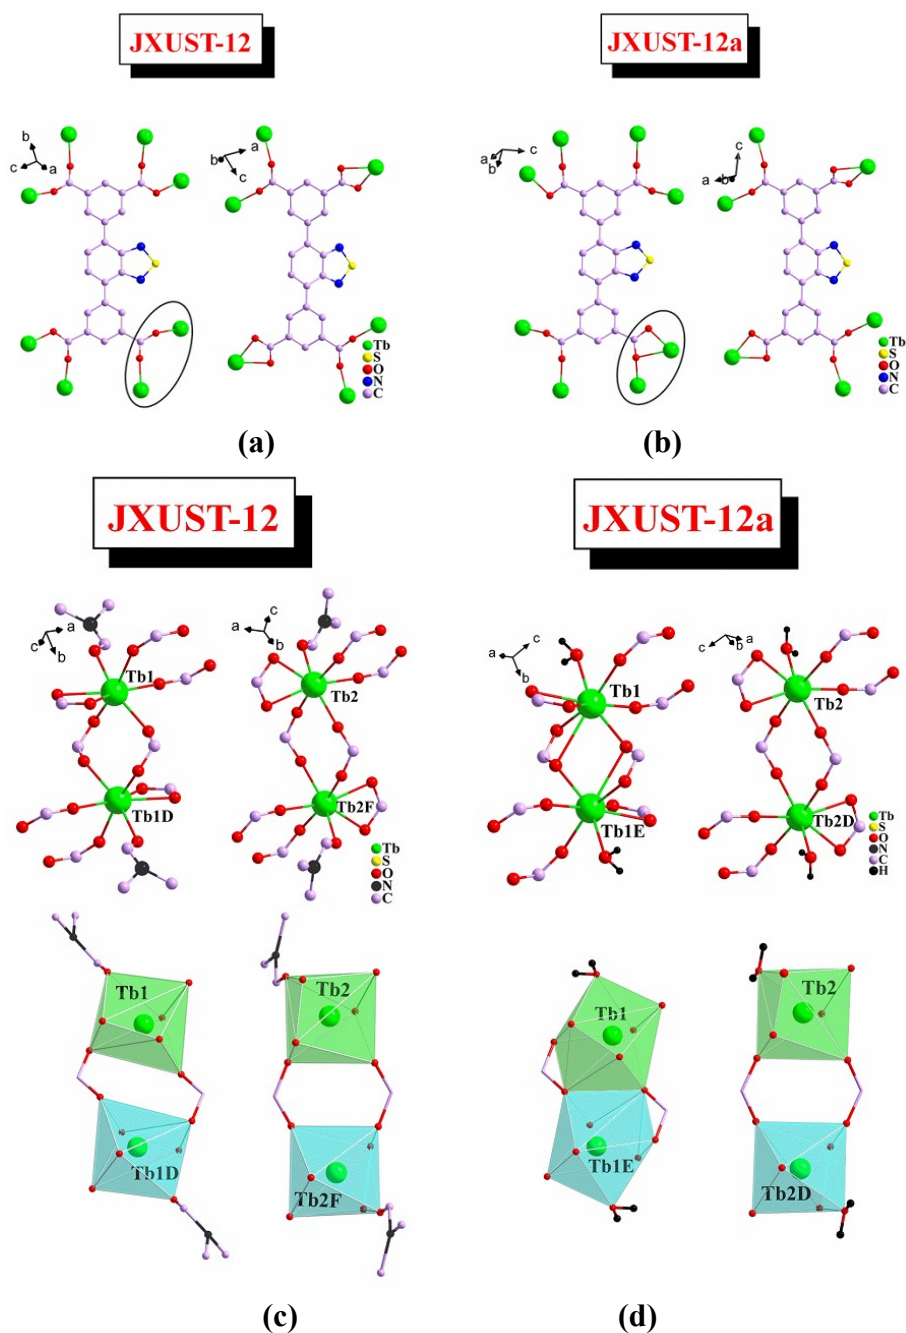

**Fig. S1.** The coordination modes of  $\text{BTDI}^{4-}$  ligands in **JXUST-12** (a) and **JXUST-12a** (b), and the coordination configurations of  $\text{Tb}^{\text{III}}$  ions in **JXUST-12** (c) and **JXUST-12a** (d).

### Section 3. Supplementary Characterizations

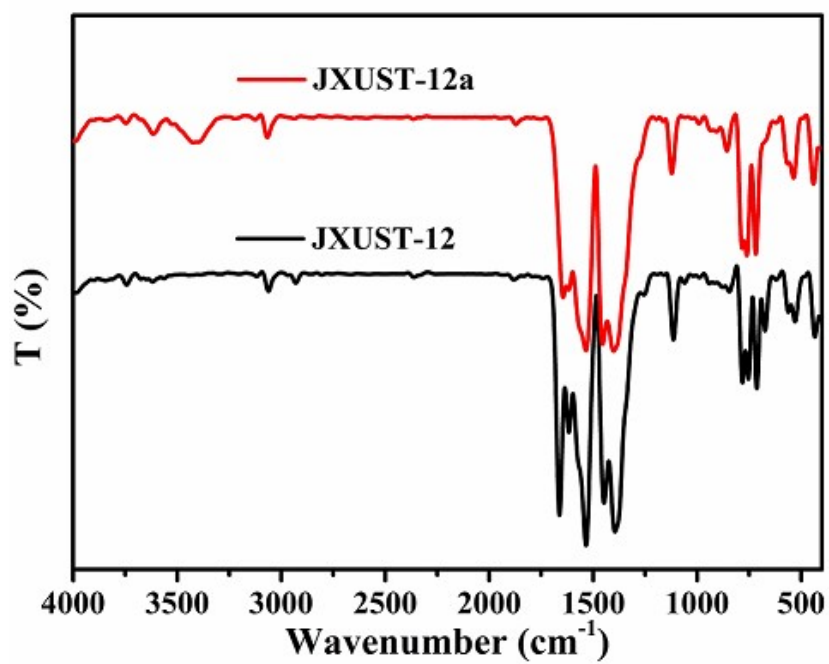

Fig. S2. IR spectra of JXUST-12 and JXUST-12a.

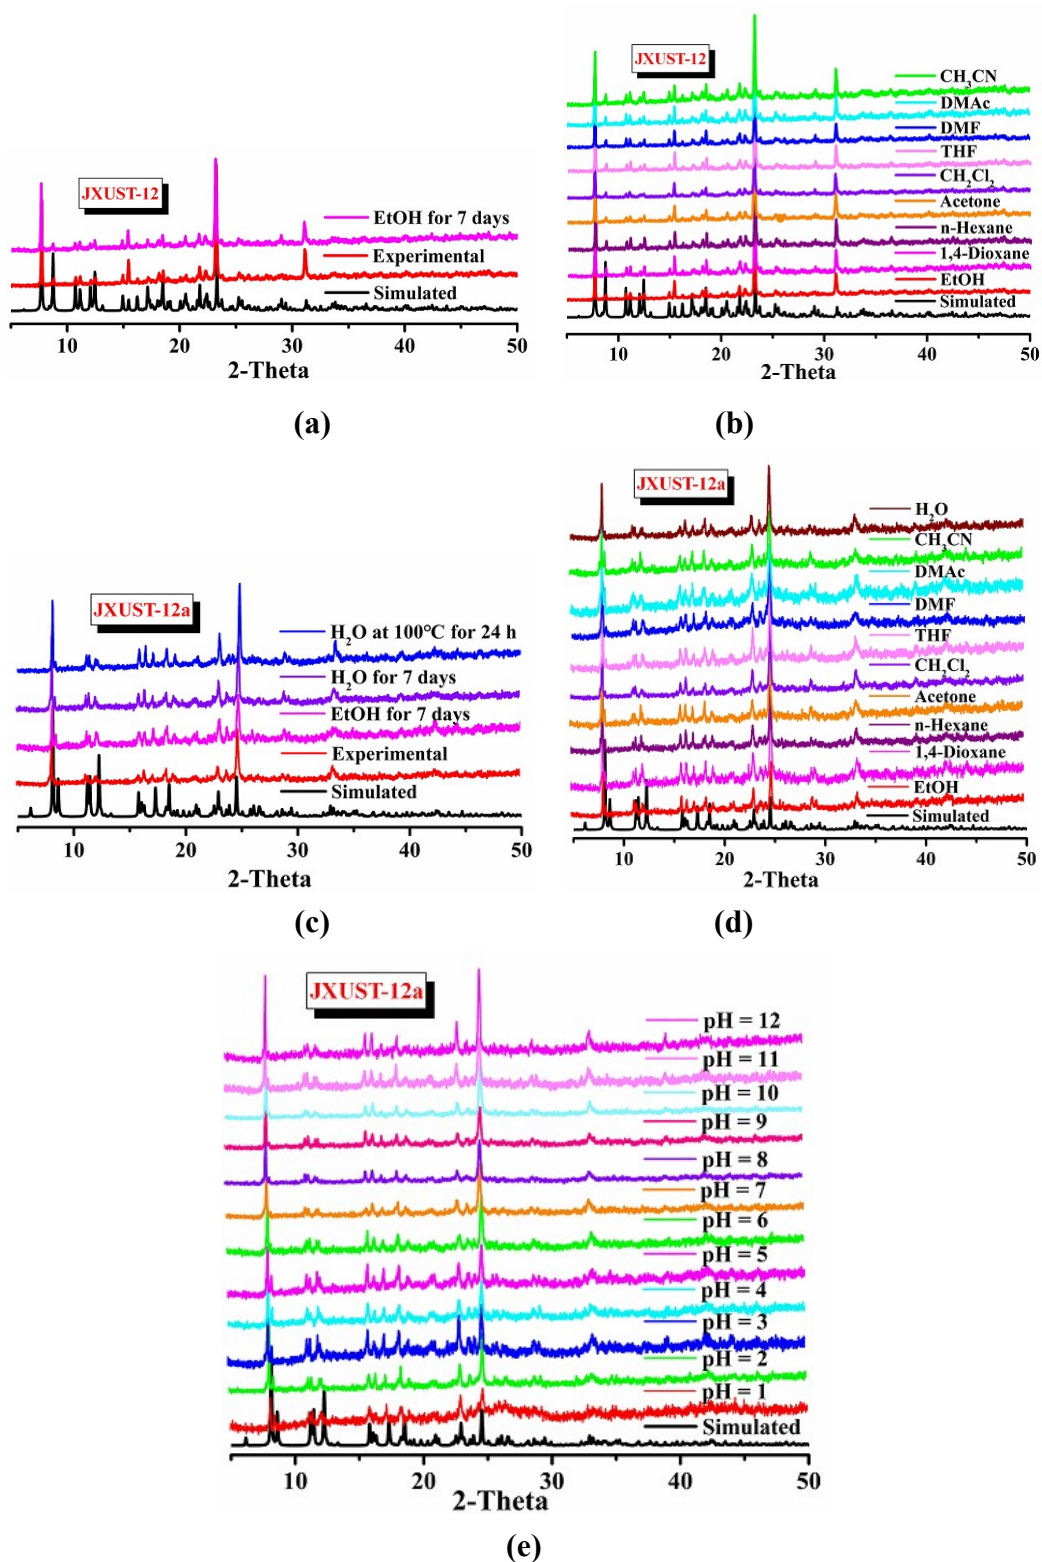

**Fig. S3.** The simulated and experimental PXRD patterns of as-synthesized samples and the samples soaked in common solvents for **JXUST-12** (a, b) and **JXUST-12a** (c, d). The PXRD patterns of **JXUST-12a** in aqueous solution with different pH values (e).

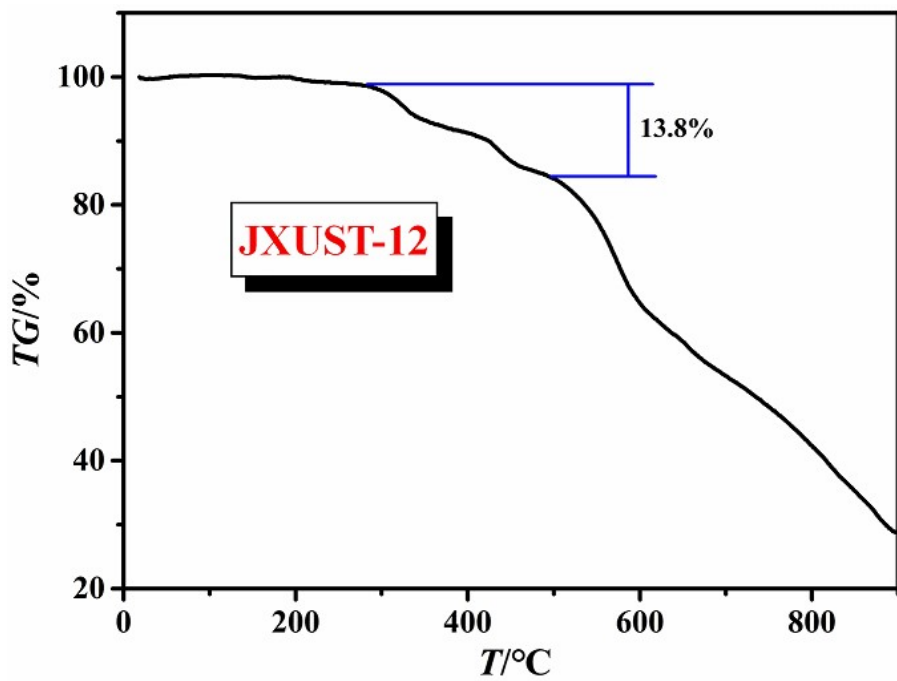

(a)

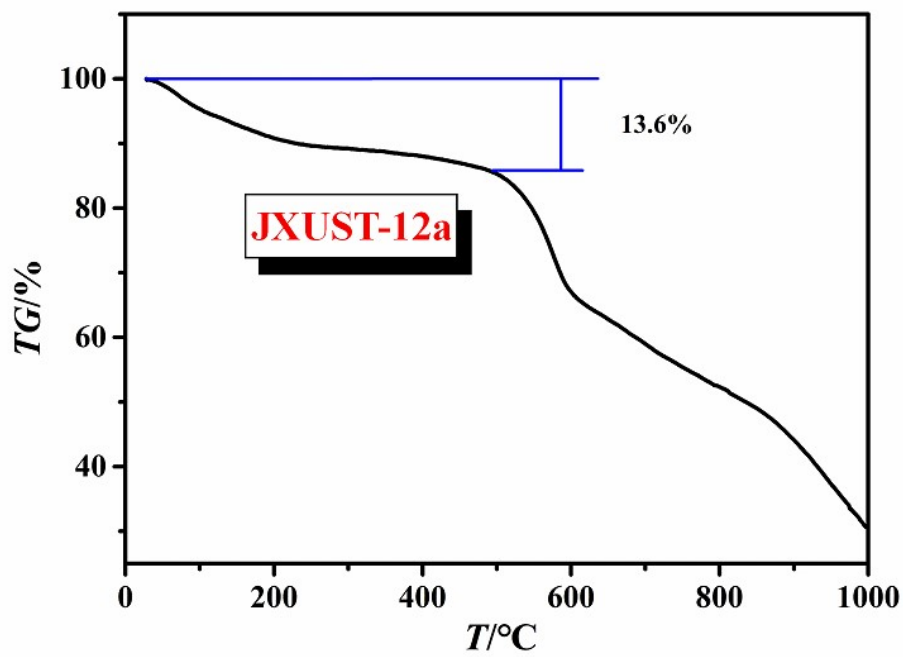

(b)

Fig. S4. The TGA curves for JXUST-12 (a) and JXUST-12a (b).

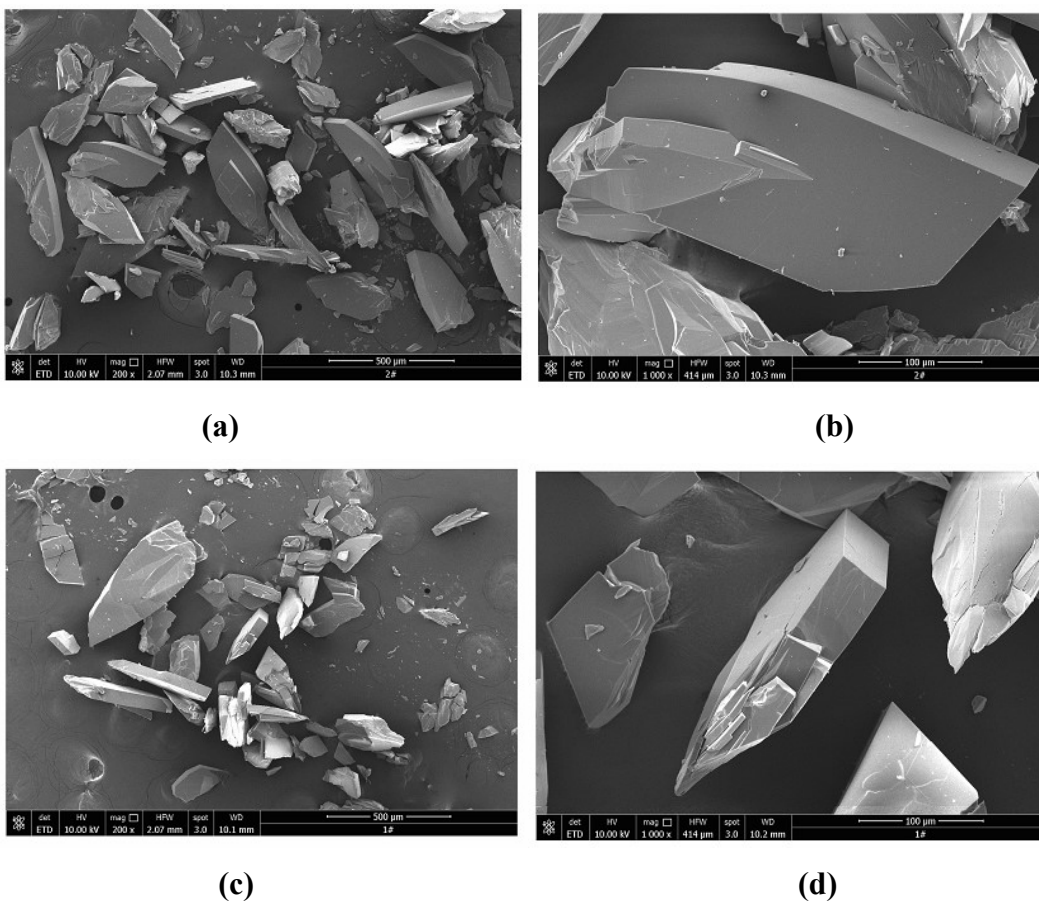

**Fig. S5.** SEM images of JXUST-12 (a) and JXUST-12a (c). Local SEM images of JXUST-12 (b) and JXUST-12a (d).

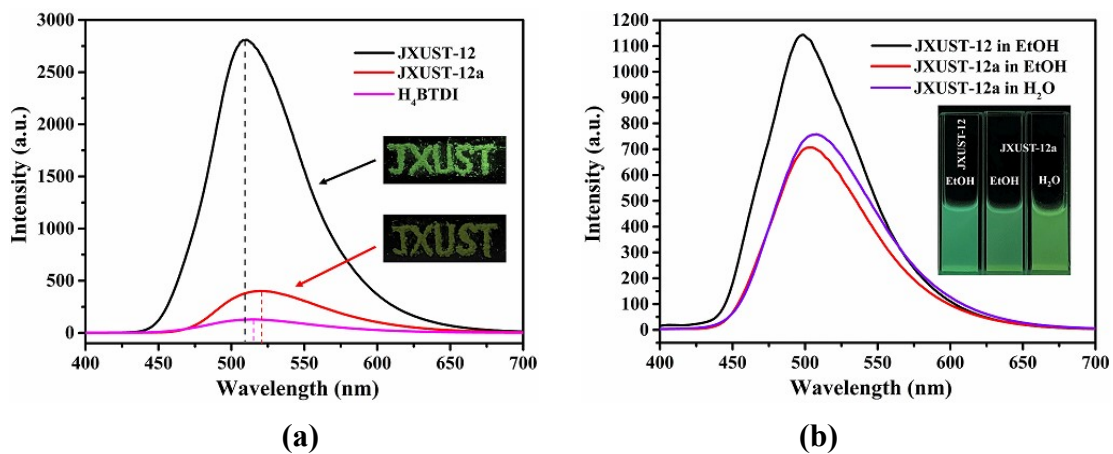

**Fig. S6.** (a) The emission spectra of H<sub>4</sub>BTDI, JXUST-12 and JXUST-12a ( $\lambda_{\text{ex}} = 370$  nm) in the solid state (Inset: the photographs of JXUST-12 and JXUST-12a in the solid state); (b) The emission spectra of H<sub>4</sub>BTDI, JXUST-12 and JXUST-12a ( $\lambda_{\text{ex}} = 370$  nm) in different solutions (Inset: the photographs of JXUST-12 and JXUST-12a in different solutions under 365 nm UV-lamp).

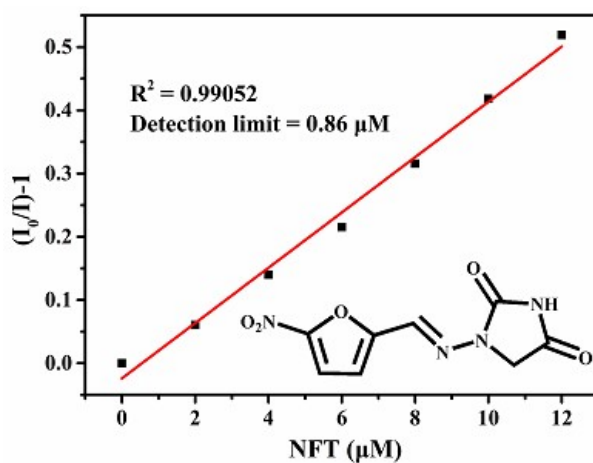

(a)

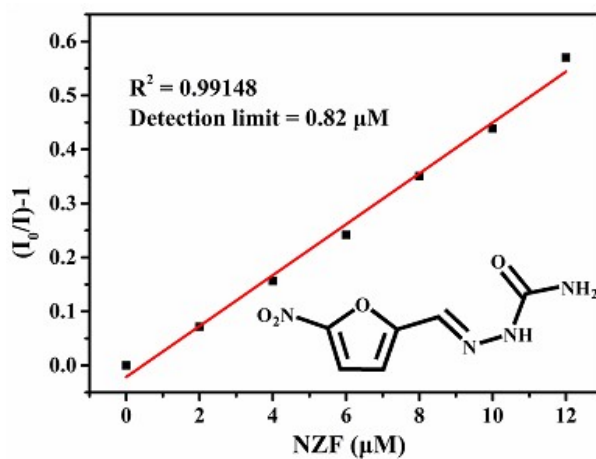

(b)

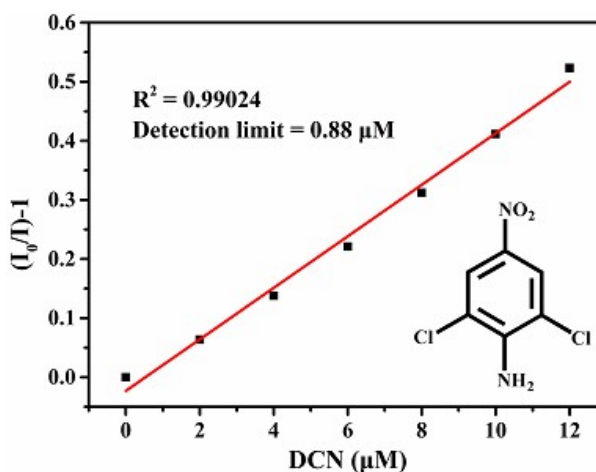

(c)

**Fig. S7.** The linear relationships between the fluorescence intensities of JXUST-12 and the concentrations of NTF (a), NZF (b) and DCN (c) in EtOH solution.



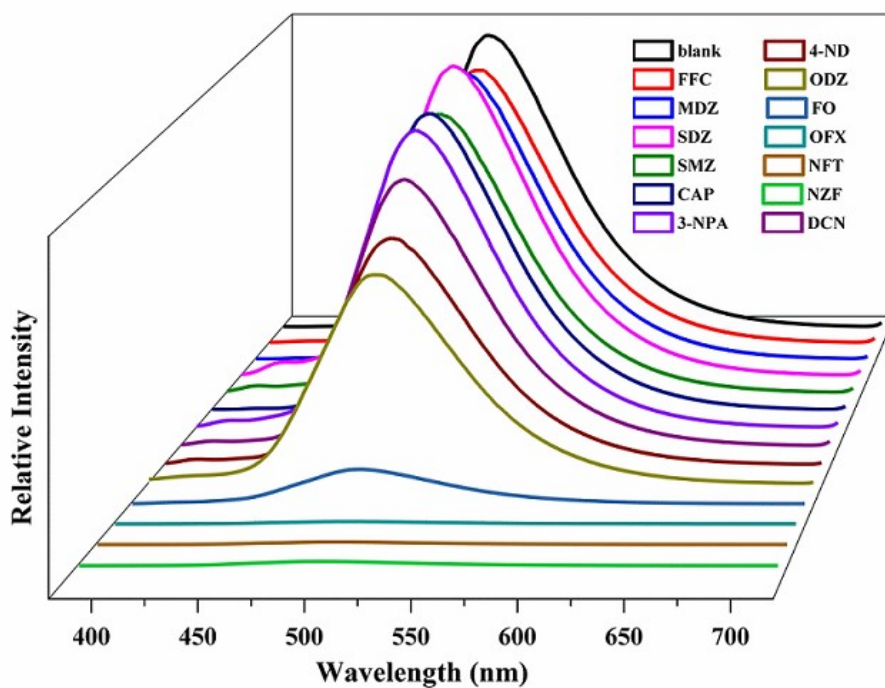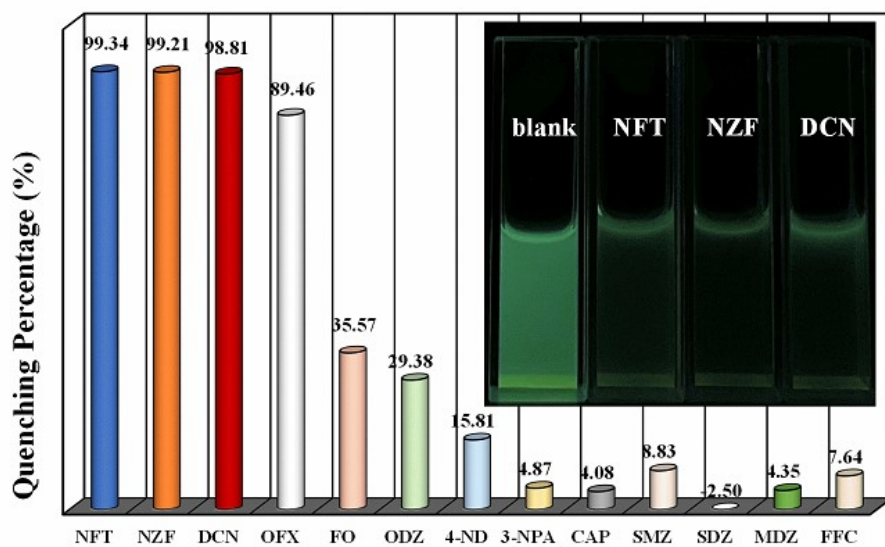

(a)

(b)

**Fig. S8.** (a) Emission spectra and (b) quenching efficiencies of **JXUST-12a** dispersed in EtOH solution containing different drugs molecules. Inset: the photographs of **JXUST-12a** dispersed in EtOH solution containing NFT, NZF and DCN under 365 nm UV-lamp.

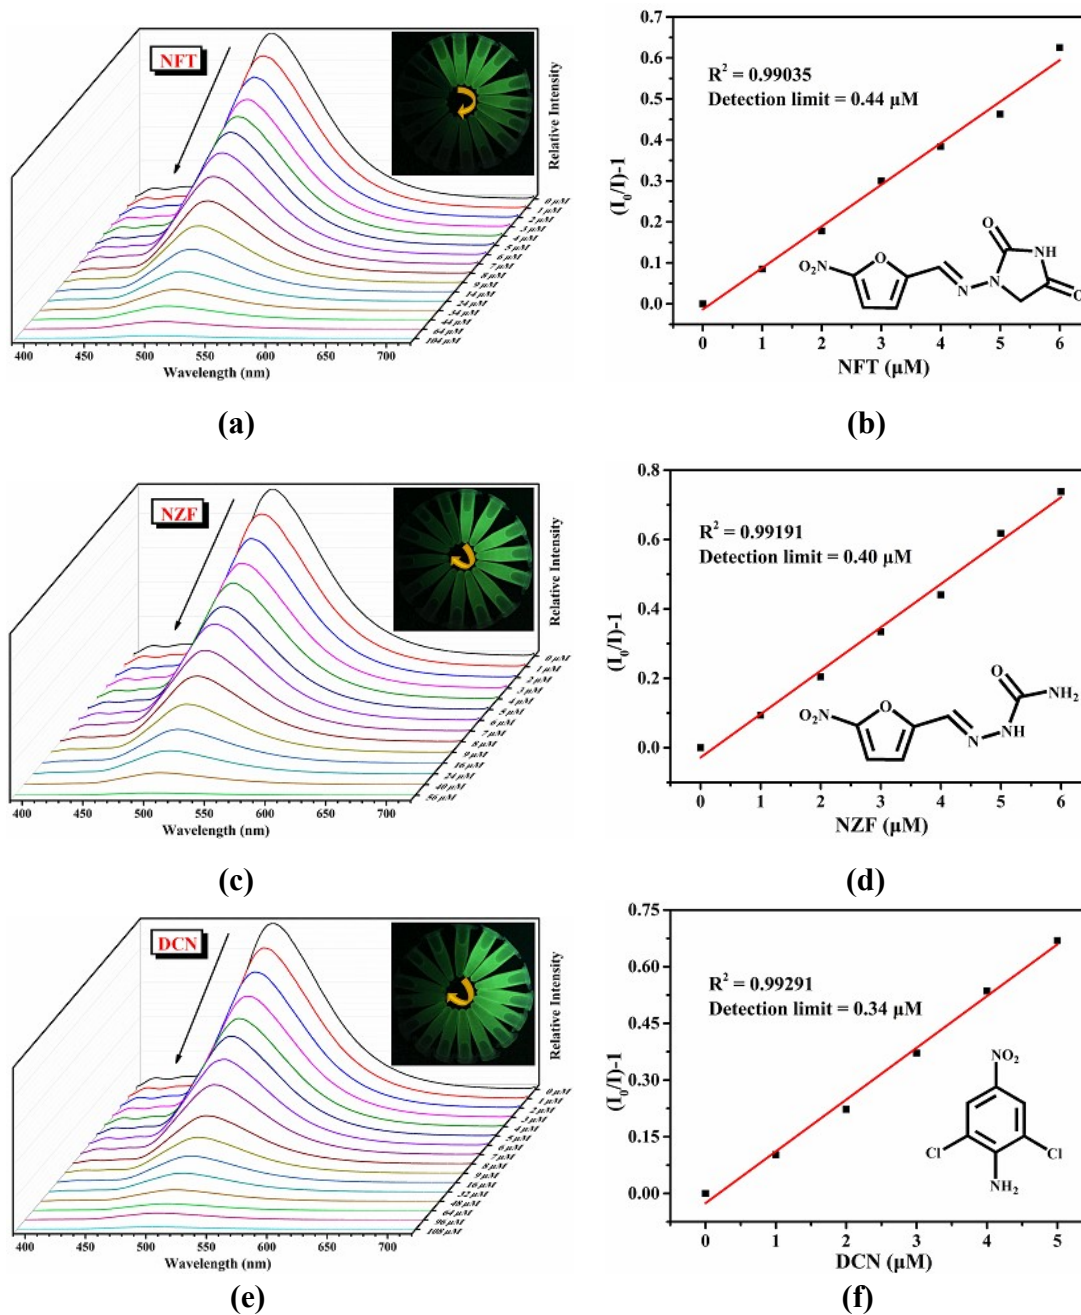

**Fig. S9.** The emission spectra of **JXUST-12a** dispersed in EtOH solution with various concentrations of NFT (a), NZF (c) and DCN (e), and the linear relationships between the fluorescence intensities of **JXUST-12a** and the concentrations of NFT (b), NZF (d) and DCN (f) in EtOH solution.

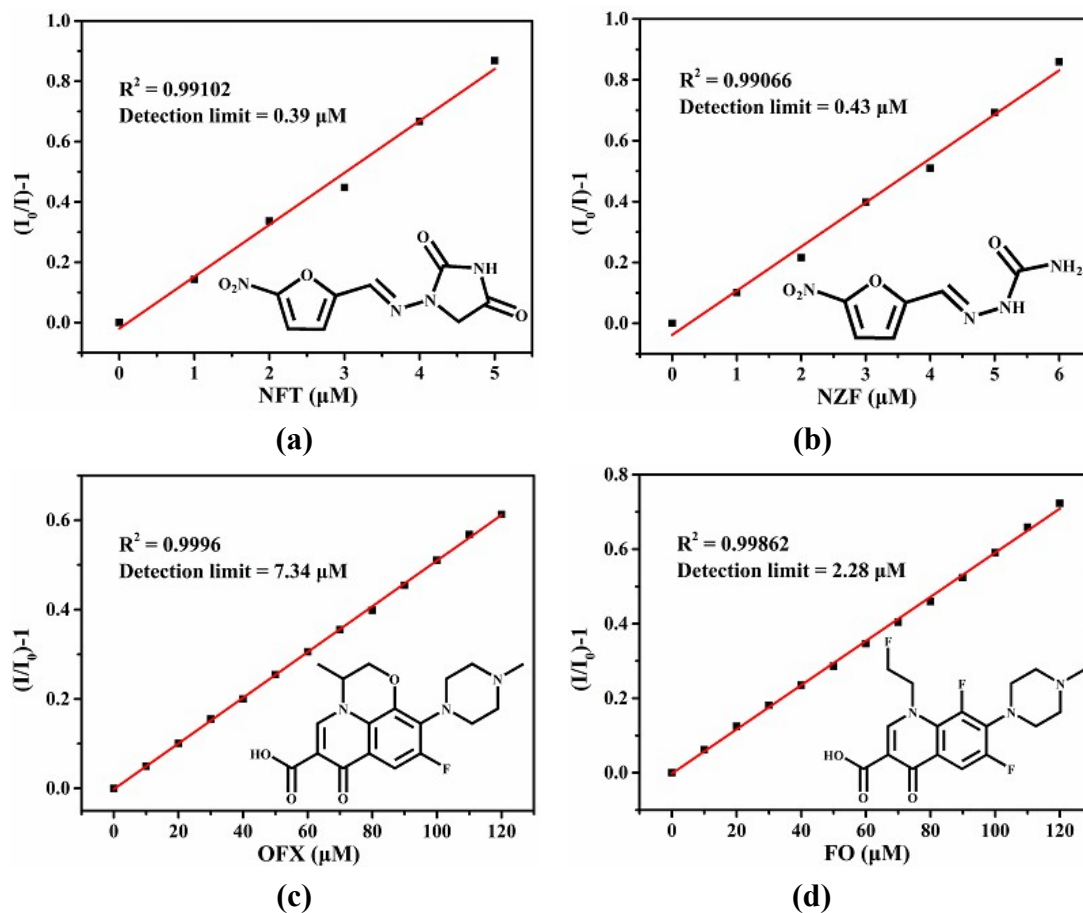

**Fig. S10.** The linear relationships between the fluorescence intensities of JXUST-12a and the concentrations of NFT (a), NZF (b), OFX (c) and OF (d) in aqueous solution.

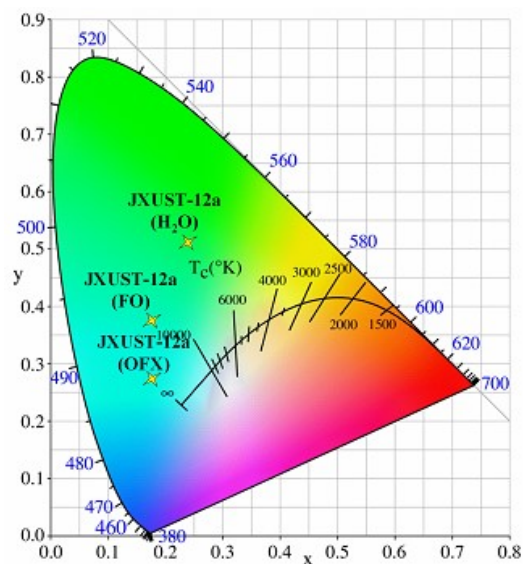

**Fig. S11.** CIE chromaticity diagram showing the color coordinates of JXUST-12a upon the addition of OFX and FO.

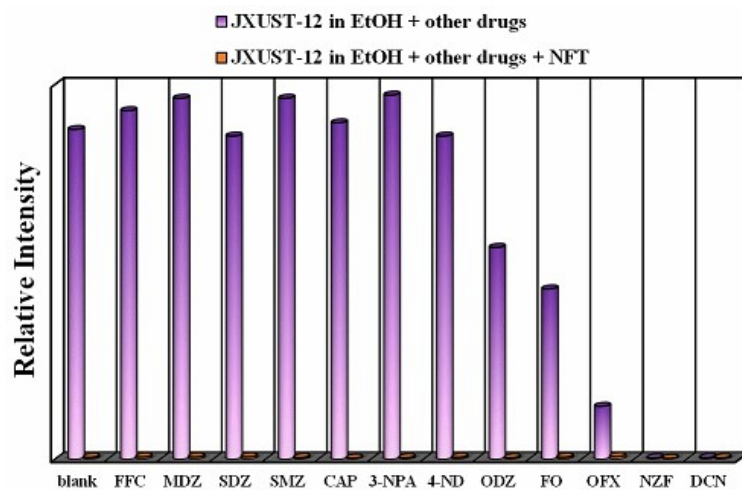

(a)

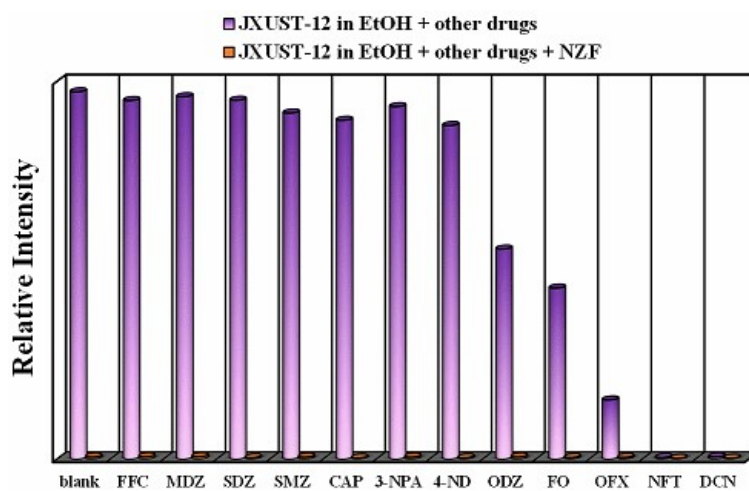

(b)

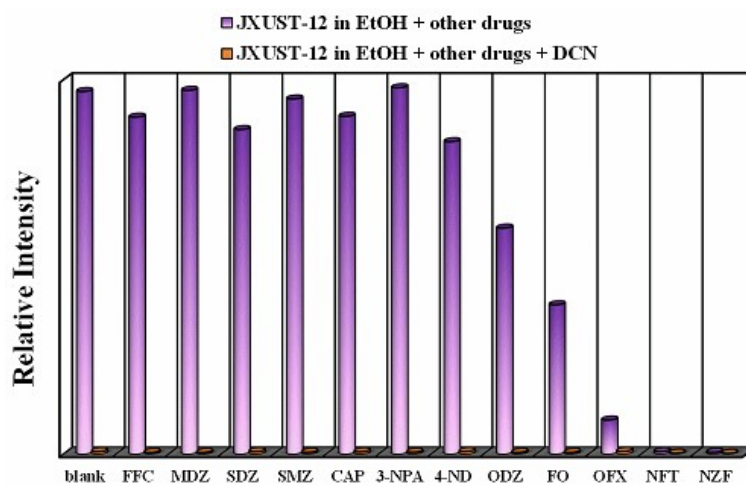

(c)

**Fig. S12.** Competitive experiments of **JXUST-12** in sensing NFT (a), NZF (b) and DCN (c) with the interference of other drug molecules (0.2 M) in EtOH solution.

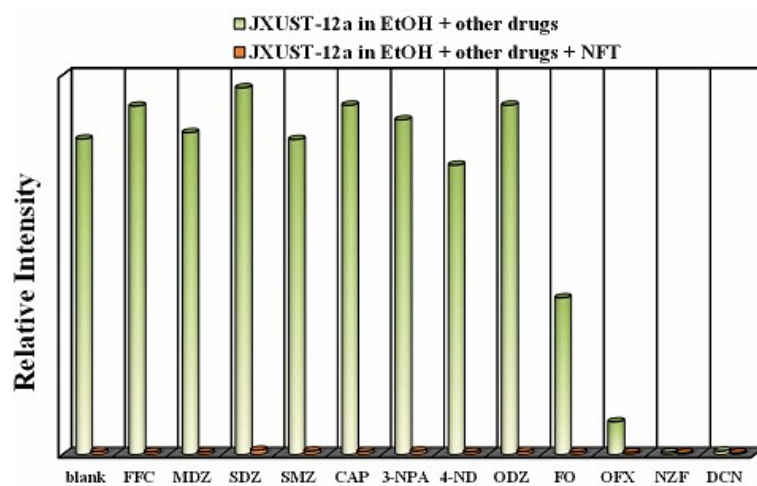

(a)

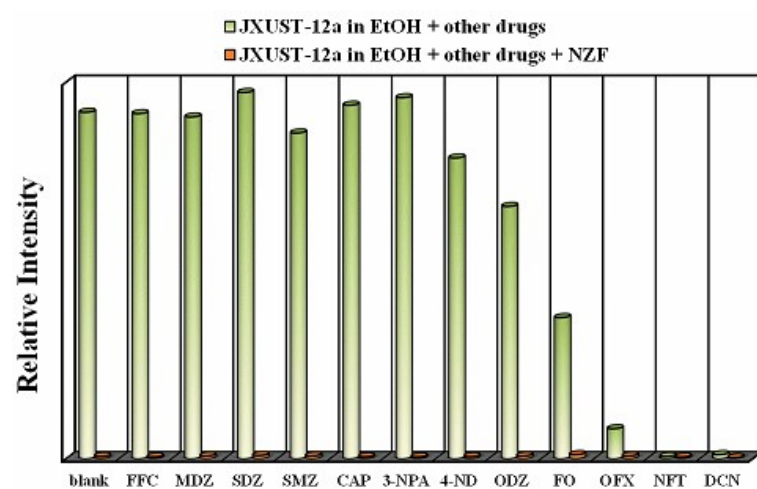

(b)

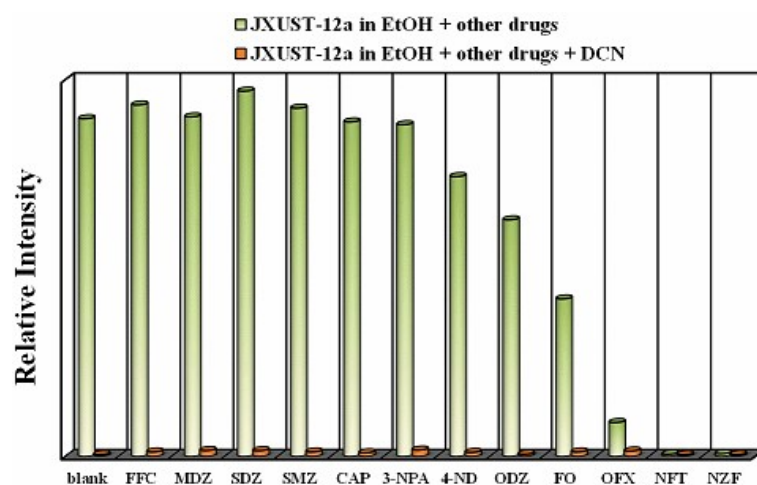

(c)

**Fig. S13.** Competitive experiments of **JXUST-12a** in sensing NFT (a), NZF (b) and DCN (c) with the interference of other drug molecules (0.2 M) in EtOH solution.

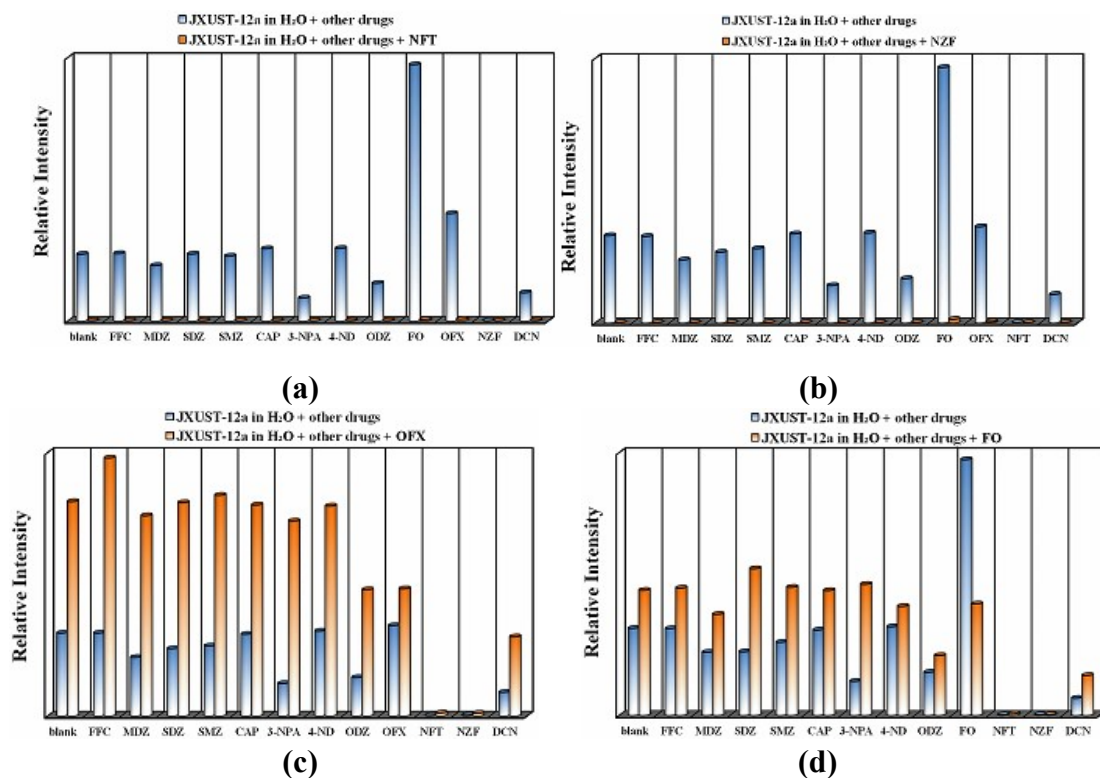

**Fig. S14.** Competitive experiments of **JXUST-12a** in sensing NFT (a), NZF (b), OFX (c) and FO (d) with the interference of other drug molecules (0.2 M) in aqueous solution.

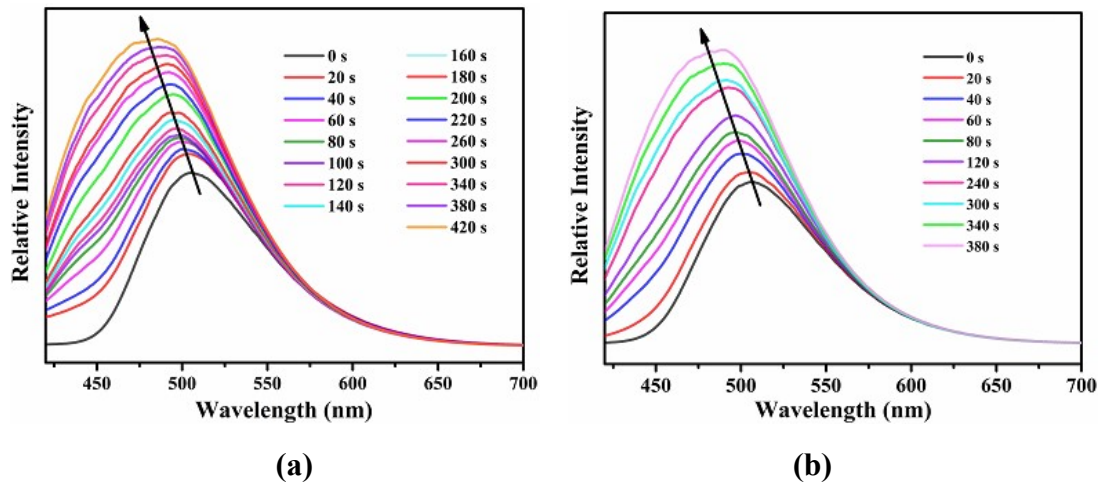

**Fig. S15.** Time-dependent emission spectra of **JXUST-12a** in aqueous suspension after adding OFX (a,  $5 \times 10^{-4}$  mol/L) and FO (b,  $5 \times 10^{-4}$  mol/L) at room temperature.

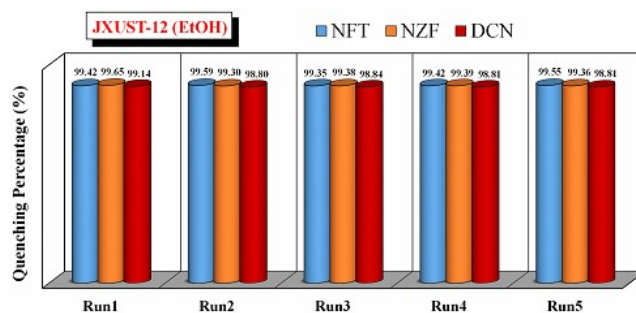

(a)

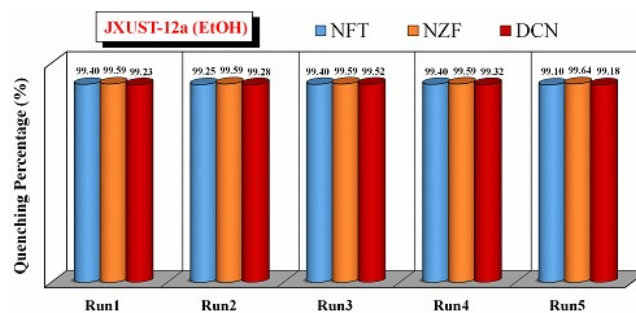

(b)

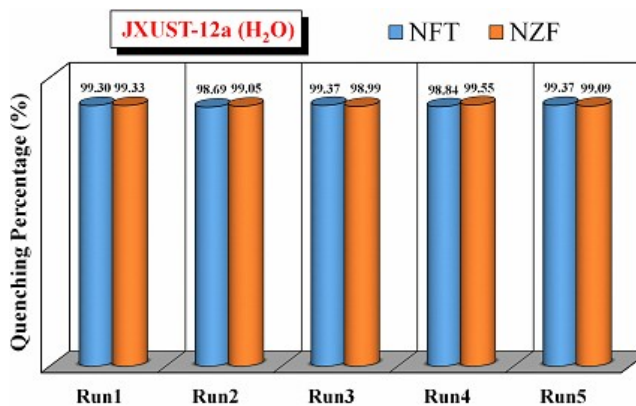

(c)

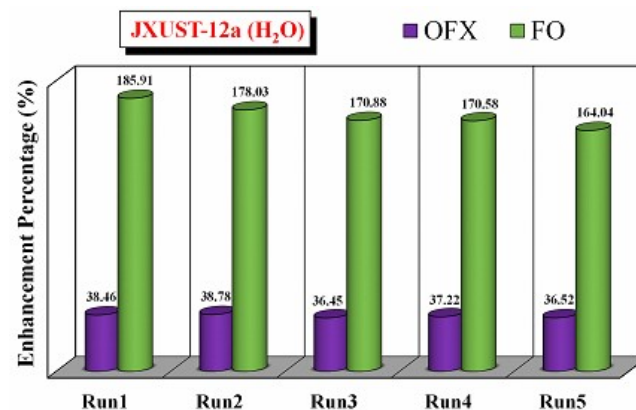

(d)

**Fig. S16.** Quenching efficiencies of **JXUST-12** (a) and **JXUST-12a** (b) in EtOH solution in the recyclable experiments for NFT, NZF and DCN; quenching efficiencies or enhancement efficiencies of **JXUST-12a** in aqueous solution in the recyclable experiments for NFT and NZF (c), and OFX and FO (d).

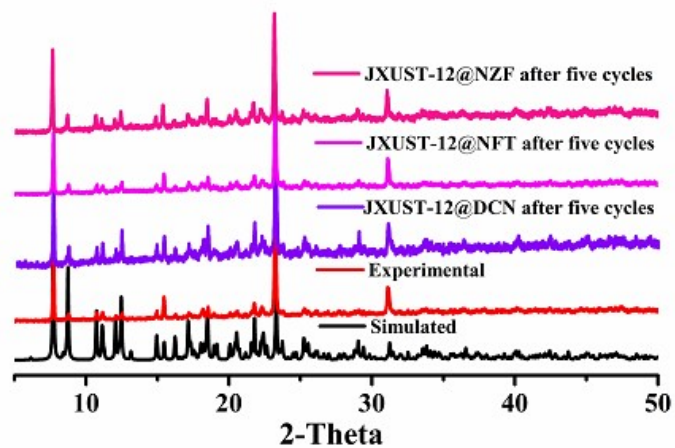

(a)

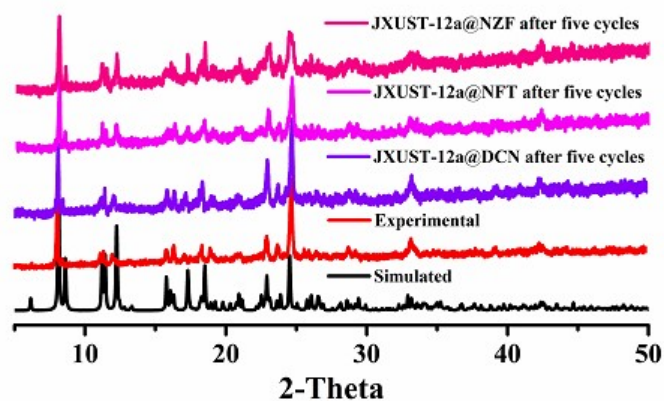

(b)

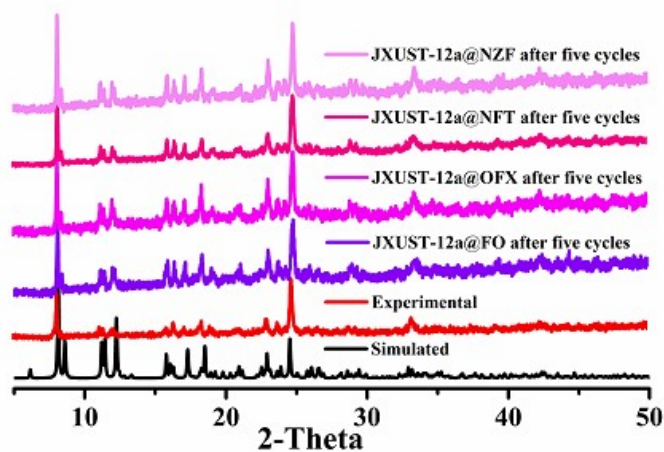

(c)

**Fig. S17.** The PXRD patterns of JXUST-12 in EtOH solution (a), JXUST-12a in EtOH solution (b) and JXUST-12a in aqueous solution (c) after five cycles of fluorescence sensing.



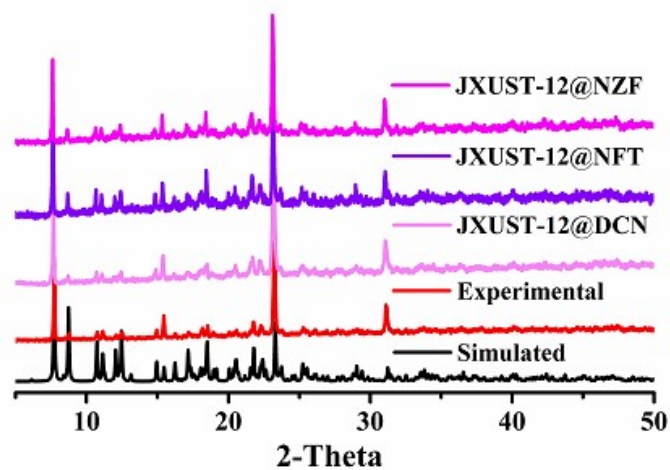

(a)

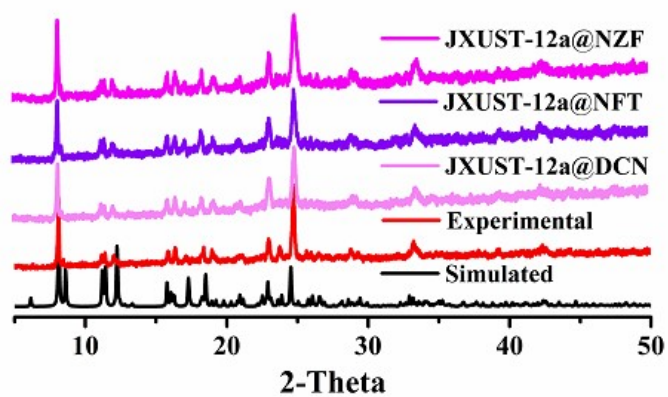

(b)

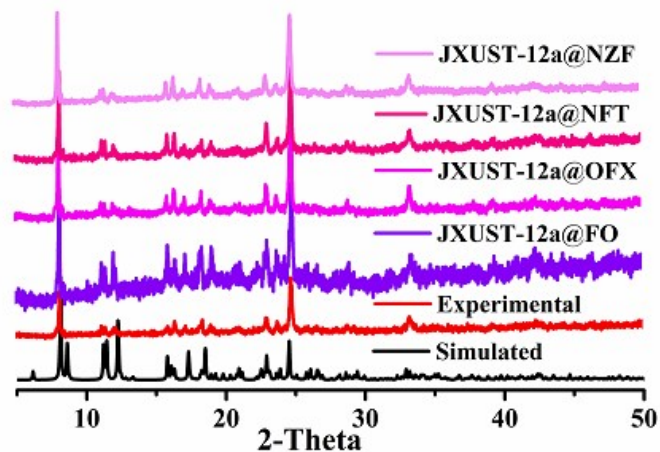

(c)

**Fig. S18.** The PXRD patterns of JXUST-12 in EtOH solution (a), JXUST-12a in EtOH solution (b) and JXUST-12a in aqueous solution (c) after adding different drugs molecules.

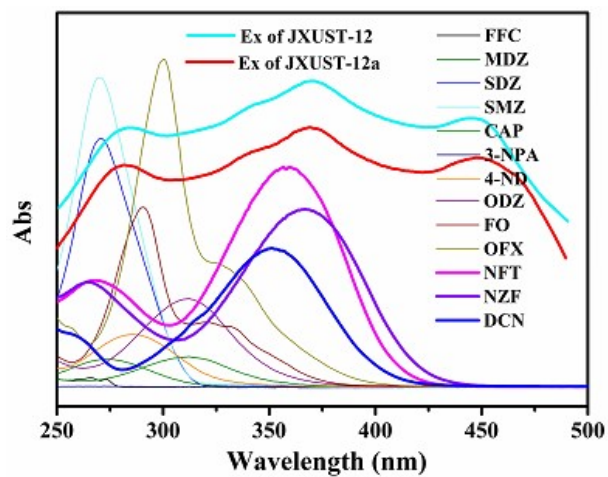

(a)

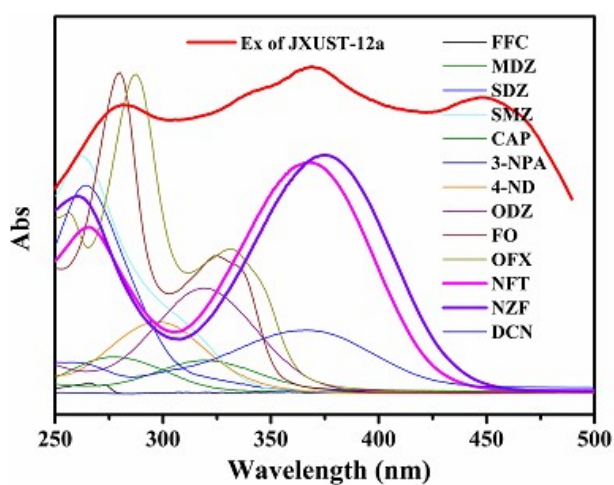

(b)

**Fig. S19.** The excitation spectra of **JXUST-12** and **JXUST-12a** in EtOH solution (a) and in aqueous solution (b) and UV-vis absorption spectra of all drug molecules.

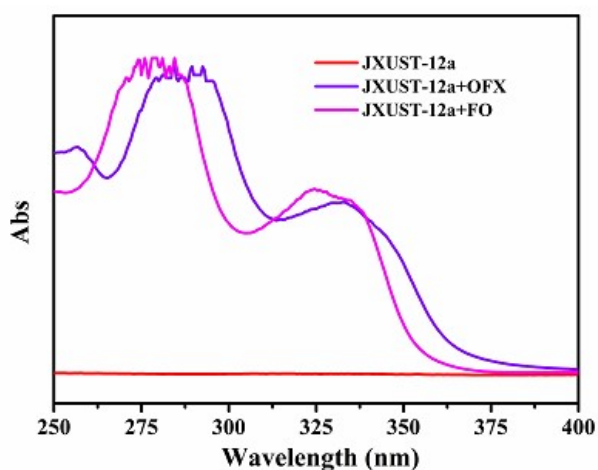

**Fig. S20.** The UV-vis absorption spectra of **JXUST-12a** and **JXUST-12a** upon the addition of OFX and FO.

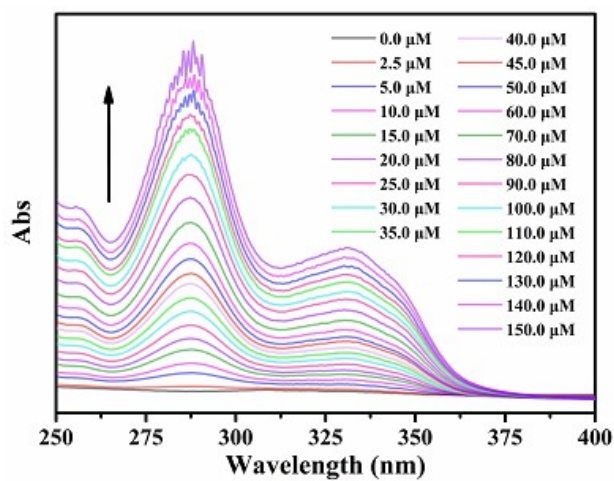

(a)

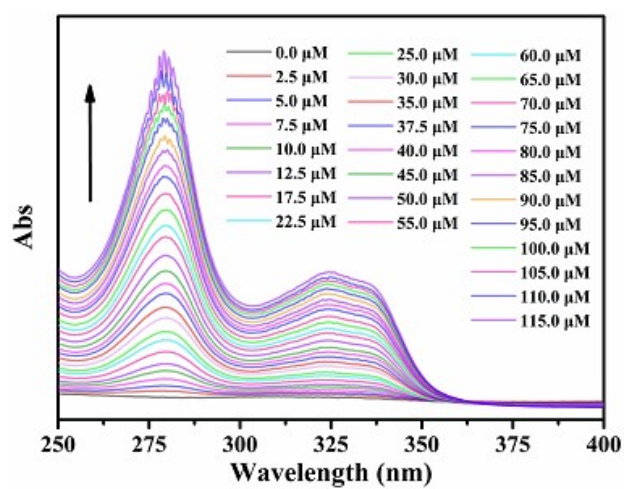

(b)

**Fig. S21.** The absorption spectra of JXUST-12a dispersed in aqueous solution after adding different concentration of OFX (a) and FO (b).
